# Supplementary material for: The Essential Oil Compositions of Ambrosia acanthicarpa Hook., Artemisia ludoviciana Nutt., and Gutierrezia sarothrae (Pursh) Britton & Rusby (Asteraceae) from the Owyhee Mountains of Idaho
Source: MDPI journal article supplement (doi:10.3390/molecules29061383), 2024-03-20
Supplement: s1 [file s1]

**Supplementary Table S1.** Instrument details for the gas chromatographic analyses of *Ambrosia acanthicarpa*, *Artemisia ludoviciana*, and *Gutierrezia sarothrae*.

| <b>Gas Chromatography - Mass Spectrometry (GC-MS)</b>           |                                                                                                                       |
|-----------------------------------------------------------------|-----------------------------------------------------------------------------------------------------------------------|
| Instrument                                                      | Shimadzu GC-MS-QP2010 Ultra (Shimadzu Scientific Instruments, Columbia, MD, USA)                                      |
| GC Column                                                       | Zebron ZB-5ms fused silica capillary column (60 m × 0.25 mm × 0.25 µm film thickness) (Phenomenex, Torrance, CA, USA) |
| MS Detector Conditions                                          | Electron impact (EI) mode, electron energy = 70 eV, a scan = 40–400 atomic mass units, scan rate = 3.0 scans/second   |
| Carrier Gas, Conditions                                         | Helium, column head pressure = 208.3 kPa, flow rate = 2.00 mL/min                                                     |
| Injector, Detector Temperatures                                 | Injector temperature = 260 °C, interface temperature = 260 °C, ion source temperature = 260 °C                        |
| GC Oven Temperature Program                                     | Initial temperature = 50 °C, ramp 2 °C/min to 260 °C, hold 260 °C for 5 min                                           |
| Sample Concentration, Volume Injected                           | 5% (in dichloromethane), 0.1 µL volume                                                                                |
| Split Mode                                                      | 24.5 : 1.0                                                                                                            |
| <b>Gas Chromatography - Flame Ionization Detection (GC-FID)</b> |                                                                                                                       |
| Instrument                                                      | Shimadzu GC 2010 with FID (Shimadzu Scientific Instruments, Columbia, MD, USA)                                        |
| GC Column                                                       | Zebron ZB-5 GC column (60 m × 0.25 mm × 0.25 µm film thickness) (Phenomenex, Torrance, CA,                            |
| Carrier Gas, Conditions                                         | Helium, column head pressure = 208.3 kPa, flow rate = 2.00 mL/min                                                     |
| Injector, Detector Temperatures                                 | 260 °C                                                                                                                |
| GC Oven Temperature Program                                     | Initial temperature = 50 °C, ramp 2 °C/min to 260 °C, hold 260 °C for 5 min                                           |
| Sample Concentration, Volume Injected                           | 5% (in dichloromethane), 0.1 µL volume                                                                                |
| Split Mode                                                      | 24.5 : 1.0                                                                                                            |
| <b>Chiral Gas Chromatography - Mass Spectrometry</b>            |                                                                                                                       |
| Instrument                                                      | Shimadzu GCMS-QP2010S (Shimadzu Scientific Instruments, Columbia, MD, USA)                                            |

|                                       |                                                                                                                     |
|---------------------------------------|---------------------------------------------------------------------------------------------------------------------|
| GC Column                             | Restek B-Dex 325 chiral GC column (30 m × 0.25 mm × 0.25 µm film thickness) ((Restek Corp., Bellefonte, PA, USA)    |
| MS Detector Conditions                | Electron impact (EI) mode, electron energy = 70 eV, a scan = 40–400 atomic mass units, scan rate = 3.0 scans/second |
| Carrier Gas, Conditions               | Helium, column head pressure = 53.6 kPa, flow rate = 1.00 mL/min                                                    |
| Injector, Detector Temperatures       | Injector temperature = 240 °C, interface temperature = 240 °C, ion source temperature = 240 °C                      |
| GC Oven Temperature Program           | Initial temperature = 50 °C, hold for 5 min, ramp 1 °C/min to 100 °C, ramp 2 °C/min to 220 °C                       |
| Sample Concentration, Volume Injected | 5% (in dichloromethane), 0.3 µL volume                                                                              |
| Split Mode                            | 24.0 : 1.0                                                                                                          |

---
